# Supplementary material for: proChIPdb: a chromatin immunoprecipitation database for prokaryotic organisms
Source: PubMed Central journal article supplement — Nucleic Acids Res. 2021 Nov 17;50(D1):D1077–84. doi: 10.1093/nar/gkab1043 (PMC8728212; doi:10.1093/nar/gkab1043), 2021-11-17
Supplement: gkab1043_supplemental_file.pdf [file gkab1043_supplemental_file.pdf]

## Supplementary materials for proChIPdb manuscript

### TABLE AND FIGURE

Figure

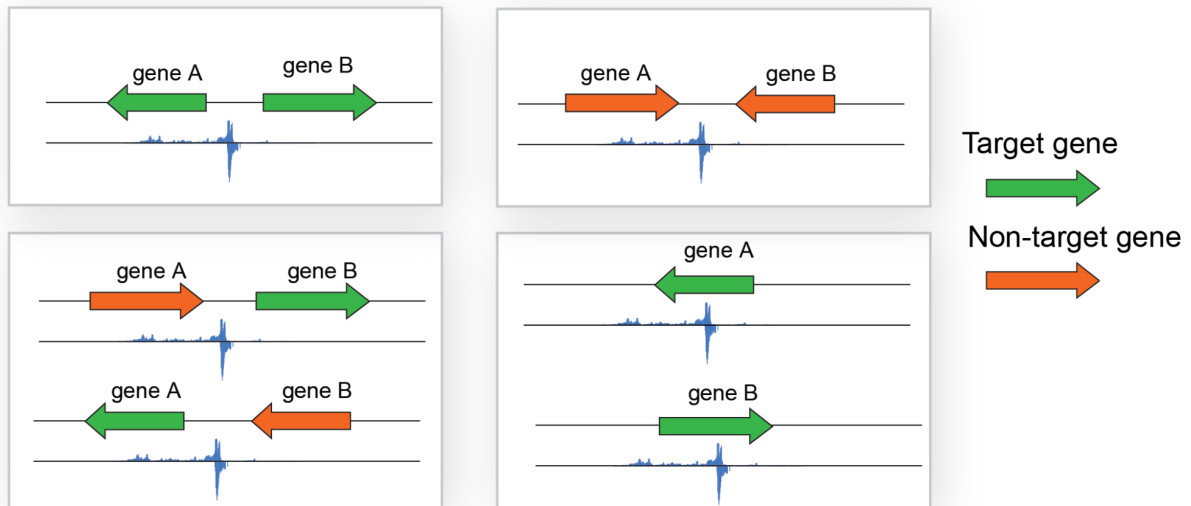

**Supplementary Figure 1: The identification of target genes in peaking calling steps.** Blue plots represent hypothetical ChIP read data, and arrows indicate genes in the neighborhood of peaks. ‘Target genes’ are defined as genes downstream of, or containing, a peak, since those relative binding locations are more likely to affect the expression of the target gene. Target genes that would be listed in proChIPdb are shown in green, and omitted genes are shown in orange.

### Table

**Supplementary Table 1: Data sources.** The full list of accession numbers and Digital Object Identifier (DOI) links (where available) for each dataset in the proChIPdb database. Links to the related TF dashboard in version 1.0.0 of the website are also included.

| Organism                          | Strain     | TF   | accession   | doi                                                                                                 | v1.0.0 TF dashboard link                                                                                                                                                                                                      |
|-----------------------------------|------------|------|-------------|-----------------------------------------------------------------------------------------------------|-------------------------------------------------------------------------------------------------------------------------------------------------------------------------------------------------------------------------------|
| <i>Corynebacterium glutamicum</i> | ATCC 13032 | MksB | PRJNA529385 | <a href="https://doi.org/10.1038/s41467-020-15238-4">https://doi.org/10.1038/s41467-020-15238-4</a> | <a href="https://prochipdb.org/tf_dashboard.html?organism=c_glutamicum&amp;tf=MksB&amp;genome=BX927147.1&amp;i=0">https://prochipdb.org/tf_dashboard.html?organism=c_glutamicum&amp;tf=MksB&amp;genome=BX927147.1&amp;i=0</a> |
| <i>Corynebacterium glutamicum</i> | ATCC 13032 | ParB | PRJNA529385 | <a href="https://doi.org/10.1038/s41467-020-15238-4">https://doi.org/10.1038/s41467-020-15238-4</a> | <a href="https://prochipdb.org/tf_dashboard.html?organism=c_glutamicum&amp;tf=ParB&amp;genome=BX927147.1&amp;i=1">https://prochipdb.org/tf_dashboard.html?organism=c_glutamicum&amp;tf=ParB&amp;genome=BX927147.1&amp;i=1</a> |
| <i>Corynebacterium glutamicum</i> | ATCC 13032 | Smc  | PRJNA529385 | <a href="https://doi.org/10.1038/s41467-020-15238-4">https://doi.org/10.1038/s41467-020-15238-4</a> | <a href="https://prochipdb.org/tf_dashboard.html?organism=c_glutamicum&amp;tf=Smc&amp;genome=BX927147.1&amp;i=2">https://prochipdb.org/tf_dashboard.html?organism=c_glutamicum&amp;tf=Smc&amp;genome=BX927147.1&amp;i=2</a>   |

|                         |                |        |             |                                                                                                         |                                                                                                                                                                                                                           |
|-------------------------|----------------|--------|-------------|---------------------------------------------------------------------------------------------------------|---------------------------------------------------------------------------------------------------------------------------------------------------------------------------------------------------------------------------|
| <i>Escherichia coli</i> | K-12<br>MG1655 | ArcA-1 | GSE182077   |                                                                                                         | <a href="https://prochipdb.org/tf_dashboard.html?organism=e_coli&amp;tf=ArcA-1&amp;genome=NC_000913.3&amp;i=62">https://prochipdb.org/tf_dashboard.html?organism=e_coli&amp;tf=ArcA-1&amp;genome=NC_000913.3&amp;i=62</a> |
| <i>Escherichia coli</i> | K-12<br>MG1655 | ArcA-2 | GSE182077   |                                                                                                         | <a href="https://prochipdb.org/tf_dashboard.html?organism=e_coli&amp;tf=ArcA-2&amp;genome=NC_000913.3&amp;i=63">https://prochipdb.org/tf_dashboard.html?organism=e_coli&amp;tf=ArcA-2&amp;genome=NC_000913.3&amp;i=63</a> |
| <i>Escherichia coli</i> | K-12<br>MG1655 | ArgR   | GSE60546    | <a href="https://doi.org/10.1093/nar/gkv150">https://doi.org/10.1093/nar/gkv150</a>                     | <a href="https://prochipdb.org/tf_dashboard.html?organism=e_coli&amp;tf=ArgR&amp;genome=NC_000913.3&amp;i=52">https://prochipdb.org/tf_dashboard.html?organism=e_coli&amp;tf=ArgR&amp;genome=NC_000913.3&amp;i=52</a>     |
| <i>Escherichia coli</i> | K-12<br>MG1655 | BaeR   | GSE143856   | <a href="https://doi.org/10.1128/mSystems.00980-20">https://doi.org/10.1128/mSystems.00980-20</a>       | <a href="https://prochipdb.org/tf_dashboard.html?organism=e_coli&amp;tf=BaeR&amp;genome=NC_000913.3&amp;i=0">https://prochipdb.org/tf_dashboard.html?organism=e_coli&amp;tf=BaeR&amp;genome=NC_000913.3&amp;i=0</a>       |
| <i>Escherichia coli</i> | K-12<br>MG1655 | CpxR   | GSE143856   | <a href="https://doi.org/10.1128/mSystems.00980-20">https://doi.org/10.1128/mSystems.00980-20</a>       | <a href="https://prochipdb.org/tf_dashboard.html?organism=e_coli&amp;tf=CpxR&amp;genome=NC_000913.3&amp;i=1">https://prochipdb.org/tf_dashboard.html?organism=e_coli&amp;tf=CpxR&amp;genome=NC_000913.3&amp;i=1</a>       |
| <i>Escherichia coli</i> | K-12<br>MG1655 | Cra    | GSE65643    | <a href="https://doi.org/10.1093/nar/gky069">https://doi.org/10.1093/nar/gky069</a>                     | <a href="https://prochipdb.org/tf_dashboard.html?organism=e_coli&amp;tf=Cra&amp;genome=NC_000913.3&amp;i=2">https://prochipdb.org/tf_dashboard.html?organism=e_coli&amp;tf=Cra&amp;genome=NC_000913.3&amp;i=2</a>         |
| <i>Escherichia coli</i> | K-12<br>MG1655 | Dps    | GSE181767   |                                                                                                         | <a href="https://prochipdb.org/tf_dashboard.html?organism=e_coli&amp;tf=Dps&amp;genome=NC_000913.3&amp;i=29">https://prochipdb.org/tf_dashboard.html?organism=e_coli&amp;tf=Dps&amp;genome=NC_000913.3&amp;i=29</a>       |
| <i>Escherichia coli</i> | K-12<br>MG1655 | Fis    | GSE181767   |                                                                                                         | <a href="https://prochipdb.org/tf_dashboard.html?organism=e_coli&amp;tf=Fis&amp;genome=NC_000913.3&amp;i=30">https://prochipdb.org/tf_dashboard.html?organism=e_coli&amp;tf=Fis&amp;genome=NC_000913.3&amp;i=30</a>       |
| <i>Escherichia coli</i> | K-12<br>MG1655 | FliC   | E-MTAB-2457 | <a href="https://doi.org/10.1371/journal.pgen.1004649">https://doi.org/10.1371/journal.pgen.1004649</a> | <a href="https://prochipdb.org/tf_dashboard.html?organism=e_coli&amp;tf=FliC&amp;genome=NC_000913.3&amp;i=47">https://prochipdb.org/tf_dashboard.html?organism=e_coli&amp;tf=FliC&amp;genome=NC_000913.3&amp;i=47</a>     |
| <i>Escherichia coli</i> | K-12<br>MG1655 | FliD   | E-MTAB-2457 | <a href="https://doi.org/10.1371/journal.pgen.1004649">https://doi.org/10.1371/journal.pgen.1004649</a> | <a href="https://prochipdb.org/tf_dashboard.html?organism=e_coli&amp;tf=FliD&amp;genome=NC_000913.3&amp;i=48">https://prochipdb.org/tf_dashboard.html?organism=e_coli&amp;tf=FliD&amp;genome=NC_000913.3&amp;i=48</a>     |
| <i>Escherichia coli</i> | K-12<br>MG1655 | FliA   | E-MTAB-2457 | <a href="https://doi.org/10.1371/journal.pgen.1004649">https://doi.org/10.1371/journal.pgen.1004649</a> | <a href="https://prochipdb.org/tf_dashboard.html?organism=e_coli&amp;tf=FliA&amp;genome=NC_000913.3&amp;i=49">https://prochipdb.org/tf_dashboard.html?organism=e_coli&amp;tf=FliA&amp;genome=NC_000913.3&amp;i=49</a>     |
| <i>Escherichia coli</i> | K-12<br>MG1655 | Fnr    | GSE41195    | <a href="https://doi.org/10.1371/journal.pgen.1003565">https://doi.org/10.1371/journal.pgen.1003565</a> | <a href="https://prochipdb.org/tf_dashboard.html?organism=e_coli&amp;tf=Fnr&amp;genome=NC_000913.3&amp;i=50">https://prochipdb.org/tf_dashboard.html?organism=e_coli&amp;tf=Fnr&amp;genome=NC_000913.3&amp;i=50</a>       |
| <i>Escherichia coli</i> | K-12<br>MG1655 | Fur    | GSE54901    | <a href="https://doi.org/10.1038/ncomms5910">https://doi.org/10.1038/ncomms5910</a>                     | <a href="https://prochipdb.org/tf_dashboard.html?organism=e_coli&amp;tf=Fur&amp;genome=NC_000913.3&amp;i=3">https://prochipdb.org/tf_dashboard.html?organism=e_coli&amp;tf=Fur&amp;genome=NC_000913.3&amp;i=3</a>         |
| <i>Escherichia coli</i> | K-12<br>MG1655 | GadE   | GSE66482    | <a href="https://doi.org/10.1038/ncomms8970">https://doi.org/10.1038/ncomms8970</a>                     | <a href="https://prochipdb.org/tf_dashboard.html?organism=e_coli&amp;tf=GadE&amp;genome=NC_000913.3&amp;i=4">https://prochipdb.org/tf_dashboard.html?organism=e_coli&amp;tf=GadE&amp;genome=NC_000913.3&amp;i=4</a>       |
| <i>Escherichia coli</i> | K-12<br>MG1655 | GadW   | GSE66482    | <a href="https://doi.org/10.1038/ncomms8970">https://doi.org/10.1038/ncomms8970</a>                     | <a href="https://prochipdb.org/tf_dashboard.html?organism=e_coli&amp;tf=GadW&amp;genome=NC_000913.3&amp;i=5">https://prochipdb.org/tf_dashboard.html?organism=e_coli&amp;tf=GadW&amp;genome=NC_000913.3&amp;i=5</a>       |
| <i>Escherichia coli</i> | K-12<br>MG1655 | GadX   | GSE66482    | <a href="https://doi.org/10.1038/ncomms8970">https://doi.org/10.1038/ncomms8970</a>                     | <a href="https://prochipdb.org/tf_dashboard.html?organism=e_coli&amp;tf=GadX&amp;genome=NC_000913.3&amp;i=6">https://prochipdb.org/tf_dashboard.html?organism=e_coli&amp;tf=GadX&amp;genome=NC_000913.3&amp;i=6</a>       |
| <i>Escherichia coli</i> | K-12<br>MG1655 | GyrA   | GSE181767   |                                                                                                         | <a href="https://prochipdb.org/tf_dashboard.html?organism=e_coli&amp;tf=GyrA&amp;genome=NC_000913.3&amp;i=31">https://prochipdb.org/tf_dashboard.html?organism=e_coli&amp;tf=GyrA&amp;genome=NC_000913.3&amp;i=31</a>     |

|                         |                |                            |           |                                                                                                         |                                                                                                                                                                                                                                                                          |
|-------------------------|----------------|----------------------------|-----------|---------------------------------------------------------------------------------------------------------|--------------------------------------------------------------------------------------------------------------------------------------------------------------------------------------------------------------------------------------------------------------------------|
| <i>Escherichia coli</i> | K-12<br>MG1655 | GyrB                       | GSE181767 |                                                                                                         | <a href="https://prochipdb.org/tf_dashboard.html?organism=e_coli&amp;tf=GyrB&amp;genome=NC_000913.3&amp;i=32">https://prochipdb.org/tf_dashboard.html?organism=e_coli&amp;tf=GyrB&amp;genome=NC_000913.3&amp;i=32</a>                                                    |
| <i>Escherichia coli</i> | K-12<br>MG1655 | H-NS                       | GSE181767 |                                                                                                         | <a href="https://prochipdb.org/tf_dashboard.html?organism=e_coli&amp;tf=H-NS&amp;genome=NC_000913.3&amp;i=33">https://prochipdb.org/tf_dashboard.html?organism=e_coli&amp;tf=H-NS&amp;genome=NC_000913.3&amp;i=33</a>                                                    |
| <i>Escherichia coli</i> | K-12<br>MG1655 | HupA                       | GSE181767 |                                                                                                         | <a href="https://prochipdb.org/tf_dashboard.html?organism=e_coli&amp;tf=HupA&amp;genome=NC_000913.3&amp;i=34">https://prochipdb.org/tf_dashboard.html?organism=e_coli&amp;tf=HupA&amp;genome=NC_000913.3&amp;i=34</a>                                                    |
| <i>Escherichia coli</i> | K-12<br>MG1655 | HupB                       | GSE181767 |                                                                                                         | <a href="https://prochipdb.org/tf_dashboard.html?organism=e_coli&amp;tf=HupB&amp;genome=NC_000913.3&amp;i=35">https://prochipdb.org/tf_dashboard.html?organism=e_coli&amp;tf=HupB&amp;genome=NC_000913.3&amp;i=35</a>                                                    |
| <i>Escherichia coli</i> | K-12<br>MG1655 | InfA                       | GSE181767 |                                                                                                         | <a href="https://prochipdb.org/tf_dashboard.html?organism=e_coli&amp;tf=InfA&amp;genome=NC_000913.3&amp;i=36">https://prochipdb.org/tf_dashboard.html?organism=e_coli&amp;tf=InfA&amp;genome=NC_000913.3&amp;i=36</a>                                                    |
| <i>Escherichia coli</i> | K-12<br>MG1655 | KdpE                       | GSE143856 | <a href="https://doi.org/10.1128/mSystems.00980-20">https://doi.org/10.1128/mSystems.00980-20</a>       | <a href="https://prochipdb.org/tf_dashboard.html?organism=e_coli&amp;tf=KdpE&amp;genome=NC_000913.3&amp;i=7">https://prochipdb.org/tf_dashboard.html?organism=e_coli&amp;tf=KdpE&amp;genome=NC_000913.3&amp;i=7</a>                                                      |
| <i>Escherichia coli</i> | K-12<br>MG1655 | MukB                       | GSE181767 |                                                                                                         | <a href="https://prochipdb.org/tf_dashboard.html?organism=e_coli&amp;tf=MukB&amp;genome=NC_000913.3&amp;i=37">https://prochipdb.org/tf_dashboard.html?organism=e_coli&amp;tf=MukB&amp;genome=NC_000913.3&amp;i=37</a>                                                    |
| <i>Escherichia coli</i> | K-12<br>MG1655 | NarL                       | GSE181772 |                                                                                                         | <a href="https://prochipdb.org/tf_dashboard.html?organism=e_coli&amp;tf=NarL&amp;genome=NC_000913.3&amp;i=43">https://prochipdb.org/tf_dashboard.html?organism=e_coli&amp;tf=NarL&amp;genome=NC_000913.3&amp;i=43</a>                                                    |
| <i>Escherichia coli</i> | K-12<br>MG1655 | OmpR                       | GSE88979  | <a href="https://doi.org/10.1038/s41598-017-02110-7">https://doi.org/10.1038/s41598-017-02110-7</a>     | <a href="https://prochipdb.org/tf_dashboard.html?organism=e_coli&amp;tf=OmpR&amp;genome=NC_000913.3&amp;i=53">https://prochipdb.org/tf_dashboard.html?organism=e_coli&amp;tf=OmpR&amp;genome=NC_000913.3&amp;i=53</a>                                                    |
| <i>Escherichia coli</i> | K-12<br>MG1655 | PhoB                       | GSE143856 | <a href="https://doi.org/10.1128/mSystems.00980-20">https://doi.org/10.1128/mSystems.00980-20</a>       | <a href="https://prochipdb.org/tf_dashboard.html?organism=e_coli&amp;tf=PhoB&amp;genome=NC_000913.3&amp;i=8">https://prochipdb.org/tf_dashboard.html?organism=e_coli&amp;tf=PhoB&amp;genome=NC_000913.3&amp;i=8</a>                                                      |
| <i>Escherichia coli</i> | K-12<br>MG1655 | PuuR                       | GSE181772 |                                                                                                         | <a href="https://prochipdb.org/tf_dashboard.html?organism=e_coli&amp;tf=PuuR&amp;genome=NC_000913.3&amp;i=44">https://prochipdb.org/tf_dashboard.html?organism=e_coli&amp;tf=PuuR&amp;genome=NC_000913.3&amp;i=44</a>                                                    |
| <i>Escherichia coli</i> | K-12<br>MG1655 | RcsA                       | GSE181772 |                                                                                                         | <a href="https://prochipdb.org/tf_dashboard.html?organism=e_coli&amp;tf=RcsA&amp;genome=NC_000913.3&amp;i=45">https://prochipdb.org/tf_dashboard.html?organism=e_coli&amp;tf=RcsA&amp;genome=NC_000913.3&amp;i=45</a>                                                    |
| <i>Escherichia coli</i> | K-12<br>MG1655 | RdgC                       | GSE181767 |                                                                                                         | <a href="https://prochipdb.org/tf_dashboard.html?organism=e_coli&amp;tf=RdgC&amp;genome=NC_000913.3&amp;i=38">https://prochipdb.org/tf_dashboard.html?organism=e_coli&amp;tf=RdgC&amp;genome=NC_000913.3&amp;i=38</a>                                                    |
| <i>Escherichia coli</i> | K-12<br>MG1655 | Rob                        | GSE181767 |                                                                                                         | <a href="https://prochipdb.org/tf_dashboard.html?organism=e_coli&amp;tf=Rob&amp;genome=NC_000913.3&amp;i=39">https://prochipdb.org/tf_dashboard.html?organism=e_coli&amp;tf=Rob&amp;genome=NC_000913.3&amp;i=39</a>                                                      |
| <i>Escherichia coli</i> | K-12<br>MG1655 | RpoB                       | GSE54901  | <a href="https://doi.org/10.1038/ncomms5910">https://doi.org/10.1038/ncomms5910</a>                     | <a href="https://prochipdb.org/tf_dashboard.html?organism=e_coli&amp;tf=RpoB&amp;genome=NC_000913.3&amp;i=9">https://prochipdb.org/tf_dashboard.html?organism=e_coli&amp;tf=RpoB&amp;genome=NC_000913.3&amp;i=9</a>                                                      |
| <i>Escherichia coli</i> | K-12<br>MG1655 | RpoB (Cra and Crp KO exps) | GSE65643  | <a href="https://doi.org/10.1093/nar/gky069">https://doi.org/10.1093/nar/gky069</a>                     | <a href="https://prochipdb.org/tf_dashboard.html?organism=e_coli&amp;tf=RpoB(Cra%20and%20Crp%20KO%20exps)&amp;genome=NC_000913.3&amp;i=46">https://prochipdb.org/tf_dashboard.html?organism=e_coli&amp;tf=RpoB (Cra and Crp KO exps)&amp;genome=NC_000913.3&amp;i=46</a> |
| <i>Escherichia coli</i> | K-12<br>MG1655 | RpoD                       | GSE41195  | <a href="https://doi.org/10.1371/journal.pgen.1003565">https://doi.org/10.1371/journal.pgen.1003565</a> | <a href="https://prochipdb.org/tf_dashboard.html?organism=e_coli&amp;tf=RpoD&amp;genome=NC_000913.3&amp;i=51">https://prochipdb.org/tf_dashboard.html?organism=e_coli&amp;tf=RpoD&amp;genome=NC_000913.3&amp;i=51</a>                                                    |

|                         |                |      |           |                                                                                                                   |                                                                                                                                                                                                                       |
|-------------------------|----------------|------|-----------|-------------------------------------------------------------------------------------------------------------------|-----------------------------------------------------------------------------------------------------------------------------------------------------------------------------------------------------------------------|
| <i>Escherichia coli</i> | K-12<br>MG1655 | RpoH | GSE60668  |                                                                                                                   | <a href="https://prochipdb.org/tf_dashboard.html?organism=e_coli&amp;tf=RpoH&amp;genome=NC_000913.3&amp;i=54">https://prochipdb.org/tf_dashboard.html?organism=e_coli&amp;tf=RpoH&amp;genome=NC_000913.3&amp;i=54</a> |
| <i>Escherichia coli</i> | K-12<br>MG1655 | StpA | GSE181767 |                                                                                                                   | <a href="https://prochipdb.org/tf_dashboard.html?organism=e_coli&amp;tf=StpA&amp;genome=NC_000913.3&amp;i=40">https://prochipdb.org/tf_dashboard.html?organism=e_coli&amp;tf=StpA&amp;genome=NC_000913.3&amp;i=40</a> |
| <i>Escherichia coli</i> | K-12<br>MG1655 | TopA | GSE181767 |                                                                                                                   | <a href="https://prochipdb.org/tf_dashboard.html?organism=e_coli&amp;tf=TopA&amp;genome=NC_000913.3&amp;i=41">https://prochipdb.org/tf_dashboard.html?organism=e_coli&amp;tf=TopA&amp;genome=NC_000913.3&amp;i=41</a> |
| <i>Escherichia coli</i> | K-12<br>MG1655 | Tus  | GSE181767 |                                                                                                                   | <a href="https://prochipdb.org/tf_dashboard.html?organism=e_coli&amp;tf=Tus&amp;genome=NC_000913.3&amp;i=42">https://prochipdb.org/tf_dashboard.html?organism=e_coli&amp;tf=Tus&amp;genome=NC_000913.3&amp;i=42</a>   |
| <i>Escherichia coli</i> | K-12<br>MG1655 | UvrY | GSE74810  | <a href="https://dx.doi.org/10.1371%2Fjournal.pone.0145035">https://dx.doi.org/10.1371%2Fjournal.pone.0145035</a> | <a href="https://prochipdb.org/tf_dashboard.html?organism=e_coli&amp;tf=UvrY&amp;genome=NC_000913.3&amp;i=64">https://prochipdb.org/tf_dashboard.html?organism=e_coli&amp;tf=UvrY&amp;genome=NC_000913.3&amp;i=64</a> |
| <i>Escherichia coli</i> | K-12<br>MG1655 | YbaO | GSE111095 | <a href="https://doi.org/10.1093/nar/gky752">https://doi.org/10.1093/nar/gky752</a>                               | <a href="https://prochipdb.org/tf_dashboard.html?organism=e_coli&amp;tf=YbaO&amp;genome=NC_000913.3&amp;i=10">https://prochipdb.org/tf_dashboard.html?organism=e_coli&amp;tf=YbaO&amp;genome=NC_000913.3&amp;i=10</a> |
| <i>Escherichia coli</i> | K-12<br>MG1655 | YbaQ | GSE111095 | <a href="https://doi.org/10.1093/nar/gky752">https://doi.org/10.1093/nar/gky752</a>                               | <a href="https://prochipdb.org/tf_dashboard.html?organism=e_coli&amp;tf=YbaQ&amp;genome=NC_000913.3&amp;i=11">https://prochipdb.org/tf_dashboard.html?organism=e_coli&amp;tf=YbaQ&amp;genome=NC_000913.3&amp;i=11</a> |
| <i>Escherichia coli</i> | K-12<br>MG1655 | Ydcl | GSE111095 | <a href="https://doi.org/10.1093/nar/gky752">https://doi.org/10.1093/nar/gky752</a>                               | <a href="https://prochipdb.org/tf_dashboard.html?organism=e_coli&amp;tf=Ydcl&amp;genome=NC_000913.3&amp;i=12">https://prochipdb.org/tf_dashboard.html?organism=e_coli&amp;tf=Ydcl&amp;genome=NC_000913.3&amp;i=12</a> |
| <i>Escherichia coli</i> | K-12<br>MG1655 | YddM | GSE111095 | <a href="https://doi.org/10.1093/nar/gky752">https://doi.org/10.1093/nar/gky752</a>                               | <a href="https://prochipdb.org/tf_dashboard.html?organism=e_coli&amp;tf=YddM&amp;genome=NC_000913.3&amp;i=13">https://prochipdb.org/tf_dashboard.html?organism=e_coli&amp;tf=YddM&amp;genome=NC_000913.3&amp;i=13</a> |
| <i>Escherichia coli</i> | K-12<br>MG1655 | YheO | GSE111095 | <a href="https://doi.org/10.1093/nar/gky752">https://doi.org/10.1093/nar/gky752</a>                               | <a href="https://prochipdb.org/tf_dashboard.html?organism=e_coli&amp;tf=YheO&amp;genome=NC_000913.3&amp;i=14">https://prochipdb.org/tf_dashboard.html?organism=e_coli&amp;tf=YheO&amp;genome=NC_000913.3&amp;i=14</a> |
| <i>Escherichia coli</i> | K-12<br>MG1655 | YiaG | GSE159777 | <a href="https://doi.org/10.1101/2021.06.10.447994">https://doi.org/10.1101/2021.06.10.447994</a>                 | <a href="https://prochipdb.org/tf_dashboard.html?organism=e_coli&amp;tf=YiaG&amp;genome=NC_000913.3&amp;i=15">https://prochipdb.org/tf_dashboard.html?organism=e_coli&amp;tf=YiaG&amp;genome=NC_000913.3&amp;i=15</a> |
| <i>Escherichia coli</i> | K-12<br>MG1655 | YieP | GSE111095 | <a href="https://doi.org/10.1093/nar/gky752">https://doi.org/10.1093/nar/gky752</a>                               | <a href="https://prochipdb.org/tf_dashboard.html?organism=e_coli&amp;tf=YieP&amp;genome=NC_000913.3&amp;i=16">https://prochipdb.org/tf_dashboard.html?organism=e_coli&amp;tf=YieP&amp;genome=NC_000913.3&amp;i=16</a> |
| <i>Escherichia coli</i> | K-12<br>MG1655 | YihL | GSE159777 | <a href="https://doi.org/10.1101/2021.06.10.447994">https://doi.org/10.1101/2021.06.10.447994</a>                 | <a href="https://prochipdb.org/tf_dashboard.html?organism=e_coli&amp;tf=YihL&amp;genome=NC_000913.3&amp;i=17">https://prochipdb.org/tf_dashboard.html?organism=e_coli&amp;tf=YihL&amp;genome=NC_000913.3&amp;i=17</a> |
| <i>Escherichia coli</i> | K-12<br>MG1655 | YihW | GSE159777 | <a href="https://doi.org/10.1101/2021.06.10.447994">https://doi.org/10.1101/2021.06.10.447994</a>                 | <a href="https://prochipdb.org/tf_dashboard.html?organism=e_coli&amp;tf=YihW&amp;genome=NC_000913.3&amp;i=18">https://prochipdb.org/tf_dashboard.html?organism=e_coli&amp;tf=YihW&amp;genome=NC_000913.3&amp;i=18</a> |
| <i>Escherichia coli</i> | K-12<br>MG1655 | YjdC | GSE159777 | <a href="https://doi.org/10.1101/2021.06.10.447994">https://doi.org/10.1101/2021.06.10.447994</a>                 | <a href="https://prochipdb.org/tf_dashboard.html?organism=e_coli&amp;tf=YjdC&amp;genome=NC_000913.3&amp;i=19">https://prochipdb.org/tf_dashboard.html?organism=e_coli&amp;tf=YjdC&amp;genome=NC_000913.3&amp;i=19</a> |
| <i>Escherichia coli</i> | K-12<br>MG1655 | Yjhl | GSE159777 | <a href="https://doi.org/10.1101/2021.06.10.447994">https://doi.org/10.1101/2021.06.10.447994</a>                 | <a href="https://prochipdb.org/tf_dashboard.html?organism=e_coli&amp;tf=Yjhl&amp;genome=NC_000913.3&amp;i=20">https://prochipdb.org/tf_dashboard.html?organism=e_coli&amp;tf=Yjhl&amp;genome=NC_000913.3&amp;i=20</a> |
| <i>Escherichia coli</i> | K-12<br>MG1655 | YneJ | GSE159777 | <a href="https://doi.org/10.1101/2021.06.10.447994">https://doi.org/10.1101/2021.06.10.447994</a>                 | <a href="https://prochipdb.org/tf_dashboard.html?organism=e_coli&amp;tf=YneJ&amp;genome=NC_000913.3&amp;i=21">https://prochipdb.org/tf_dashboard.html?organism=e_coli&amp;tf=YneJ&amp;genome=NC_000913.3&amp;i=21</a> |

|                                   |                                      |                  |           |                                                                                                         |                                                                                                                                                                                                                                               |
|-----------------------------------|--------------------------------------|------------------|-----------|---------------------------------------------------------------------------------------------------------|-----------------------------------------------------------------------------------------------------------------------------------------------------------------------------------------------------------------------------------------------|
| <i>Escherichia coli</i>           | K-12<br>MG1655                       | YnfL             | GSE159777 | <a href="https://doi.org/10.1101/2021.06.10.447994">https://doi.org/10.1101/2021.06.10.447994</a>       | <a href="https://prochipdb.org/tf_dashboard.html?organism=e_coli&amp;tf=YnfL&amp;genome=NC_000913.3&amp;i=22">https://prochipdb.org/tf_dashboard.html?organism=e_coli&amp;tf=YnfL&amp;genome=NC_000913.3&amp;i=22</a>                         |
| <i>Escherichia coli</i>           | K-12<br>MG1655                       | YpdC             | GSE159777 | <a href="https://doi.org/10.1101/2021.06.10.447994">https://doi.org/10.1101/2021.06.10.447994</a>       | <a href="https://prochipdb.org/tf_dashboard.html?organism=e_coli&amp;tf=YpdC&amp;genome=NC_000913.3&amp;i=23">https://prochipdb.org/tf_dashboard.html?organism=e_coli&amp;tf=YpdC&amp;genome=NC_000913.3&amp;i=23</a>                         |
| <i>Escherichia coli</i>           | K-12<br>MG1655                       | YqhC             | GSE159777 | <a href="https://doi.org/10.1101/2021.06.10.447994">https://doi.org/10.1101/2021.06.10.447994</a>       | <a href="https://prochipdb.org/tf_dashboard.html?organism=e_coli&amp;tf=YqhC&amp;genome=NC_000913.3&amp;i=24">https://prochipdb.org/tf_dashboard.html?organism=e_coli&amp;tf=YqhC&amp;genome=NC_000913.3&amp;i=24</a>                         |
| <i>Escherichia coli</i>           | K-12<br>MG1655                       | ZraR             | GSE143856 | <a href="https://doi.org/10.1128/mSystems.00980-20">https://doi.org/10.1128/mSystems.00980-20</a>       | <a href="https://prochipdb.org/tf_dashboard.html?organism=e_coli&amp;tf=ZraR&amp;genome=NC_000913.3&amp;i=25">https://prochipdb.org/tf_dashboard.html?organism=e_coli&amp;tf=ZraR&amp;genome=NC_000913.3&amp;i=25</a>                         |
| <i>Escherichia coli</i>           | K-12<br>MG1655                       | mixed-TFs-pool1a | GSE182078 |                                                                                                         | <a href="https://prochipdb.org/tf_dashboard.html?organism=e_coli&amp;tf=mixed-TFs-pool1a&amp;genome=NC_000913.3&amp;i=55">https://prochipdb.org/tf_dashboard.html?organism=e_coli&amp;tf=mixed-TFs-pool1a&amp;genome=NC_000913.3&amp;i=55</a> |
| <i>Escherichia coli</i>           | K-12<br>MG1655                       | mixed-TFs-pool1b | GSE182078 |                                                                                                         | <a href="https://prochipdb.org/tf_dashboard.html?organism=e_coli&amp;tf=mixed-TFs-pool1b&amp;genome=NC_000913.3&amp;i=56">https://prochipdb.org/tf_dashboard.html?organism=e_coli&amp;tf=mixed-TFs-pool1b&amp;genome=NC_000913.3&amp;i=56</a> |
| <i>Escherichia coli</i>           | K-12<br>MG1655                       | mixed-TFs-pool1c | GSE182078 |                                                                                                         | <a href="https://prochipdb.org/tf_dashboard.html?organism=e_coli&amp;tf=mixed-TFs-pool1c&amp;genome=NC_000913.3&amp;i=57">https://prochipdb.org/tf_dashboard.html?organism=e_coli&amp;tf=mixed-TFs-pool1c&amp;genome=NC_000913.3&amp;i=57</a> |
| <i>Escherichia coli</i>           | K-12<br>MG1655                       | mixed-TFs-pool2  | GSE182078 |                                                                                                         | <a href="https://prochipdb.org/tf_dashboard.html?organism=e_coli&amp;tf=mixed-TFs-pool2&amp;genome=NC_000913.3&amp;i=58">https://prochipdb.org/tf_dashboard.html?organism=e_coli&amp;tf=mixed-TFs-pool2&amp;genome=NC_000913.3&amp;i=58</a>   |
| <i>Escherichia coli</i>           | K-12<br>MG1655                       | mixed-TFs-pool3  | GSE182078 |                                                                                                         | <a href="https://prochipdb.org/tf_dashboard.html?organism=e_coli&amp;tf=mixed-TFs-pool3&amp;genome=NC_000913.3&amp;i=59">https://prochipdb.org/tf_dashboard.html?organism=e_coli&amp;tf=mixed-TFs-pool3&amp;genome=NC_000913.3&amp;i=59</a>   |
| <i>Escherichia coli</i>           | K-12<br>MG1655                       | mixed-TFs-pool4  | GSE182078 |                                                                                                         | <a href="https://prochipdb.org/tf_dashboard.html?organism=e_coli&amp;tf=mixed-TFs-pool4&amp;genome=NC_000913.3&amp;i=60">https://prochipdb.org/tf_dashboard.html?organism=e_coli&amp;tf=mixed-TFs-pool4&amp;genome=NC_000913.3&amp;i=60</a>   |
| <i>Escherichia coli</i>           | K-12<br>MG1655                       | mixed-TFs-pool5  | GSE182078 |                                                                                                         | <a href="https://prochipdb.org/tf_dashboard.html?organism=e_coli&amp;tf=mixed-TFs-pool5&amp;genome=NC_000913.3&amp;i=61">https://prochipdb.org/tf_dashboard.html?organism=e_coli&amp;tf=mixed-TFs-pool5&amp;genome=NC_000913.3&amp;i=61</a>   |
| <i>Escherichia coli</i>           | O157:H7<br>EDL933                    | Fur              | GSE181770 |                                                                                                         | <a href="https://prochipdb.org/tf_dashboard.html?organism=e_coli&amp;tf=Fur&amp;genome=AE005174.2&amp;i=26">https://prochipdb.org/tf_dashboard.html?organism=e_coli&amp;tf=Fur&amp;genome=AE005174.2&amp;i=26</a>                             |
| <i>Escherichia coli</i>           | SMS-3-5                              | Fur              | GSE181770 |                                                                                                         | <a href="https://prochipdb.org/tf_dashboard.html?organism=e_coli&amp;tf=Fur&amp;genome=NC_010498.1&amp;i=27">https://prochipdb.org/tf_dashboard.html?organism=e_coli&amp;tf=Fur&amp;genome=NC_010498.1&amp;i=27</a>                           |
| <i>Escherichia coli</i>           | UMN026                               | Fur              | GSE181770 |                                                                                                         | <a href="https://prochipdb.org/tf_dashboard.html?organism=e_coli&amp;tf=Fur&amp;genome=CU928163.2&amp;i=28">https://prochipdb.org/tf_dashboard.html?organism=e_coli&amp;tf=Fur&amp;genome=CU928163.2&amp;i=28</a>                             |
| <i>Klebsiella pneumoniae</i>      | MGH<br>78578                         | Fur              | GSE181770 |                                                                                                         | <a href="https://prochipdb.org/tf_dashboard.html?organism=k_pneumoniae&amp;tf=Fur&amp;genome=CP_000647.1&amp;i=0">https://prochipdb.org/tf_dashboard.html?organism=k_pneumoniae&amp;tf=Fur&amp;genome=CP_000647.1&amp;i=0</a>                 |
| <i>Leptospira interrogans</i>     | Copenha<br>geni<br>Fiocruz<br>L1-130 | LexA1            | GSE73688  | <a href="https://doi.org/10.1093/nar/gkv1536">https://doi.org/10.1093/nar/gkv1536</a>                   | <a href="https://prochipdb.org/tf_dashboard.html?organism=l_interrogans&amp;tf=LexA1&amp;genome=NC_005823.1&amp;i=0">https://prochipdb.org/tf_dashboard.html?organism=l_interrogans&amp;tf=LexA1&amp;genome=NC_005823.1&amp;i=0</a>           |
| <i>Mycobacterium tuberculosis</i> | H37Rv                                | EspR             | GSE35149  | <a href="https://doi.org/10.1371/journal.ppat.1002621">https://doi.org/10.1371/journal.ppat.1002621</a> | <a href="https://prochipdb.org/tf_dashboard.html?organism=m_tuberculosis&amp;tf=EspR&amp;genome=NC_000962.2&amp;i=0">https://prochipdb.org/tf_dashboard.html?organism=m_tuberculosis&amp;tf=EspR&amp;genome=NC_000962.2&amp;i=0</a>           |

|                                |        |         |           |                                                                                                     |                                                                                                                                                                                                                                   |
|--------------------------------|--------|---------|-----------|-----------------------------------------------------------------------------------------------------|-----------------------------------------------------------------------------------------------------------------------------------------------------------------------------------------------------------------------------------|
| <i>Pseudomonas aeruginosa</i>  | PAO1   | AlgR    | GSE65356  | <a href="https://doi.org/10.1093/nar/gkv747">https://doi.org/10.1093/nar/gkv747</a>                 | <a href="https://prochipdb.org/tf_dashboard.html?organism=p_aeruginosa&amp;tf=AlgR&amp;genome=NC_002516.2&amp;i=9">https://prochipdb.org/tf_dashboard.html?organism=p_aeruginosa&amp;tf=AlgR&amp;genome=NC_002516.2&amp;i=9</a>   |
| <i>Pseudomonas aeruginosa</i>  | PAO1   | ExsA    | GSE65356  | <a href="https://doi.org/10.1093/nar/gkv747">https://doi.org/10.1093/nar/gkv747</a>                 | <a href="https://prochipdb.org/tf_dashboard.html?organism=p_aeruginosa&amp;tf=ExsA&amp;genome=NC_002516.2&amp;i=10">https://prochipdb.org/tf_dashboard.html?organism=p_aeruginosa&amp;tf=ExsA&amp;genome=NC_002516.2&amp;i=10</a> |
| <i>Pseudomonas aeruginosa</i>  | PAO1   | FleQ    | GSE128430 | <a href="https://doi.org/10.1038/s41467-019-10778-w">https://doi.org/10.1038/s41467-019-10778-w</a> | <a href="https://prochipdb.org/tf_dashboard.html?organism=p_aeruginosa&amp;tf=FleQ&amp;genome=NC_002516.2&amp;i=0">https://prochipdb.org/tf_dashboard.html?organism=p_aeruginosa&amp;tf=FleQ&amp;genome=NC_002516.2&amp;i=0</a>   |
| <i>Pseudomonas aeruginosa</i>  | PAO1   | GacA    | GSE65356  | <a href="https://doi.org/10.1093/nar/gkv747">https://doi.org/10.1093/nar/gkv747</a>                 | <a href="https://prochipdb.org/tf_dashboard.html?organism=p_aeruginosa&amp;tf=GacA&amp;genome=NC_002516.2&amp;i=11">https://prochipdb.org/tf_dashboard.html?organism=p_aeruginosa&amp;tf=GacA&amp;genome=NC_002516.2&amp;i=11</a> |
| <i>Pseudomonas aeruginosa</i>  | PAO1   | GbdR    | GSE128430 | <a href="https://doi.org/10.1038/s41467-019-10778-w">https://doi.org/10.1038/s41467-019-10778-w</a> | <a href="https://prochipdb.org/tf_dashboard.html?organism=p_aeruginosa&amp;tf=GbdR&amp;genome=NC_002516.2&amp;i=1">https://prochipdb.org/tf_dashboard.html?organism=p_aeruginosa&amp;tf=GbdR&amp;genome=NC_002516.2&amp;i=1</a>   |
| <i>Pseudomonas aeruginosa</i>  | PAO1   | MexT    | GSE65356  | <a href="https://doi.org/10.1093/nar/gkv747">https://doi.org/10.1093/nar/gkv747</a>                 | <a href="https://prochipdb.org/tf_dashboard.html?organism=p_aeruginosa&amp;tf=MexT&amp;genome=NC_002516.2&amp;i=12">https://prochipdb.org/tf_dashboard.html?organism=p_aeruginosa&amp;tf=MexT&amp;genome=NC_002516.2&amp;i=12</a> |
| <i>Pseudomonas aeruginosa</i>  | PAO1   | MvfR    | GSE65356  | <a href="https://doi.org/10.1093/nar/gkv747">https://doi.org/10.1093/nar/gkv747</a>                 | <a href="https://prochipdb.org/tf_dashboard.html?organism=p_aeruginosa&amp;tf=MvfR&amp;genome=NC_002516.2&amp;i=5">https://prochipdb.org/tf_dashboard.html?organism=p_aeruginosa&amp;tf=MvfR&amp;genome=NC_002516.2&amp;i=5</a>   |
| <i>Pseudomonas aeruginosa</i>  | PAO1   | PchR    | GSE128430 | <a href="https://doi.org/10.1038/s41467-019-10778-w">https://doi.org/10.1038/s41467-019-10778-w</a> | <a href="https://prochipdb.org/tf_dashboard.html?organism=p_aeruginosa&amp;tf=PchR&amp;genome=NC_002516.2&amp;i=2">https://prochipdb.org/tf_dashboard.html?organism=p_aeruginosa&amp;tf=PchR&amp;genome=NC_002516.2&amp;i=2</a>   |
| <i>Pseudomonas aeruginosa</i>  | PAO1   | PhoB    | GSE128430 | <a href="https://doi.org/10.1038/s41467-019-10778-w">https://doi.org/10.1038/s41467-019-10778-w</a> | <a href="https://prochipdb.org/tf_dashboard.html?organism=p_aeruginosa&amp;tf=PhoB&amp;genome=NC_002516.2&amp;i=3">https://prochipdb.org/tf_dashboard.html?organism=p_aeruginosa&amp;tf=PhoB&amp;genome=NC_002516.2&amp;i=3</a>   |
| <i>Pseudomonas aeruginosa</i>  | PAO1   | RpoN    | GSE65356  | <a href="https://doi.org/10.1093/nar/gkv747">https://doi.org/10.1093/nar/gkv747</a>                 | <a href="https://prochipdb.org/tf_dashboard.html?organism=p_aeruginosa&amp;tf=RpoN&amp;genome=NC_002516.2&amp;i=7">https://prochipdb.org/tf_dashboard.html?organism=p_aeruginosa&amp;tf=RpoN&amp;genome=NC_002516.2&amp;i=7</a>   |
| <i>Pseudomonas aeruginosa</i>  | PAO1   | SoxR    | GSE65356  | <a href="https://doi.org/10.1093/nar/gkv747">https://doi.org/10.1093/nar/gkv747</a>                 | <a href="https://prochipdb.org/tf_dashboard.html?organism=p_aeruginosa&amp;tf=SoxR&amp;genome=NC_002516.2&amp;i=6">https://prochipdb.org/tf_dashboard.html?organism=p_aeruginosa&amp;tf=SoxR&amp;genome=NC_002516.2&amp;i=6</a>   |
| <i>Pseudomonas aeruginosa</i>  | PAO1   | SphR    | GSE128430 | <a href="https://doi.org/10.1038/s41467-019-10778-w">https://doi.org/10.1038/s41467-019-10778-w</a> | <a href="https://prochipdb.org/tf_dashboard.html?organism=p_aeruginosa&amp;tf=SphR&amp;genome=NC_002516.2&amp;i=4">https://prochipdb.org/tf_dashboard.html?organism=p_aeruginosa&amp;tf=SphR&amp;genome=NC_002516.2&amp;i=4</a>   |
| <i>Pseudomonas aeruginosa</i>  | PAO1   | Vfr     | GSE65356  | <a href="https://doi.org/10.1093/nar/gkv747">https://doi.org/10.1093/nar/gkv747</a>                 | <a href="https://prochipdb.org/tf_dashboard.html?organism=p_aeruginosa&amp;tf=Vfr&amp;genome=NC_002516.2&amp;i=8">https://prochipdb.org/tf_dashboard.html?organism=p_aeruginosa&amp;tf=Vfr&amp;genome=NC_002516.2&amp;i=8</a>     |
| <i>Pseudomonas aeruginosa</i>  | PAO1   | WspR    | GSE65356  | <a href="https://doi.org/10.1093/nar/gkv747">https://doi.org/10.1093/nar/gkv747</a>                 | <a href="https://prochipdb.org/tf_dashboard.html?organism=p_aeruginosa&amp;tf=WspR&amp;genome=NC_002516.2&amp;i=13">https://prochipdb.org/tf_dashboard.html?organism=p_aeruginosa&amp;tf=WspR&amp;genome=NC_002516.2&amp;i=13</a> |
| <i>Pseudomonas fluorescens</i> | F113   | AmrZ    | SRP039494 | <a href="https://doi.org/10.1186/1471-2164-15-237">https://doi.org/10.1186/1471-2164-15-237</a>     | <a href="https://prochipdb.org/tf_dashboard.html?organism=p_fluorescens&amp;tf=AmrZ&amp;genome=NC_016830.1&amp;i=0">https://prochipdb.org/tf_dashboard.html?organism=p_fluorescens&amp;tf=AmrZ&amp;genome=NC_016830.1&amp;i=0</a> |
| <i>Pseudomonas putida</i>      | KT2440 | Fur     | GSE181775 |                                                                                                     | <a href="https://prochipdb.org/tf_dashboard.html?organism=p_putida&amp;tf=Fur&amp;genome=NC_002947.4&amp;i=0">https://prochipdb.org/tf_dashboard.html?organism=p_putida&amp;tf=Fur&amp;genome=NC_002947.4&amp;i=0</a>             |
| <i>Pseudomonas putida</i>      | KT2440 | Sigma D | GSE181775 |                                                                                                     | <a href="https://prochipdb.org/tf_dashboard.html?organism=p_putida&amp;tf=SigmaD&amp;genome=NC_002947.4&amp;i=1">https://prochipdb.org/tf_dashboard.html?organism=p_putida&amp;tf=SigmaD&amp;genome=NC_002947.4&amp;i=1</a>       |

|                                    |                 |       |             |                                                                                                   |                                                                                                                                                                                                                                                   |
|------------------------------------|-----------------|-------|-------------|---------------------------------------------------------------------------------------------------|---------------------------------------------------------------------------------------------------------------------------------------------------------------------------------------------------------------------------------------------------|
| <i>Salmonella enterica</i>         | Typhimurium LT2 | Fur   | GSE181770   |                                                                                                   | <a href="https://prochipdb.org/tf_dashboard.html?organism=s_enterica&amp;tf=Fur&amp;genome=NC_003197.2&amp;i=0">https://prochipdb.org/tf_dashboard.html?organism=s_enterica&amp;tf=Fur&amp;genome=NC_003197.2&amp;i=0</a>                         |
| <i>Salmonella enterica</i>         | Typhimurium LT2 | YdcI  | GSE181791   |                                                                                                   | <a href="https://prochipdb.org/tf_dashboard.html?organism=s_enterica&amp;tf=YdcI&amp;genome=NC_003197.2&amp;i=1">https://prochipdb.org/tf_dashboard.html?organism=s_enterica&amp;tf=YdcI&amp;genome=NC_003197.2&amp;i=1</a>                       |
| <i>Shigella flexneri</i>           | 2a, 2457T       | Fur   | GSE181770   |                                                                                                   | <a href="https://prochipdb.org/tf_dashboard.html?organism=s_flexneri&amp;tf=Fur&amp;genome=AF014073.1&amp;i=0">https://prochipdb.org/tf_dashboard.html?organism=s_flexneri&amp;tf=Fur&amp;genome=AF014073.1&amp;i=0</a>                           |
| <i>Staphylococcus aureus</i>       | LAC chromosome  | CodY  | GSE159856   | <a href="https://doi.org/10.1101/2021.01.08.426013">https://doi.org/10.1101/2021.01.08.426013</a> | <a href="https://prochipdb.org/tf_dashboard.html?organism=s_aureus&amp;tf=CodY&amp;genome=CP035369.1&amp;i=0">https://prochipdb.org/tf_dashboard.html?organism=s_aureus&amp;tf=CodY&amp;genome=CP035369.1&amp;i=0</a>                             |
| <i>Staphylococcus aureus</i>       | USA300_TCH1516  | SigS  | GSE182080   |                                                                                                   | <a href="https://prochipdb.org/tf_dashboard.html?organism=s_aureus&amp;tf=SigS&amp;genome=NC_010079&amp;i=1">https://prochipdb.org/tf_dashboard.html?organism=s_aureus&amp;tf=SigS&amp;genome=NC_010079&amp;i=1</a>                               |
| <i>Staphylococcus aureus</i>       | USA300_TCH1516  | VraR  | GSE182080   |                                                                                                   | <a href="https://prochipdb.org/tf_dashboard.html?organism=s_aureus&amp;tf=VraR&amp;genome=NC_010079&amp;i=2">https://prochipdb.org/tf_dashboard.html?organism=s_aureus&amp;tf=VraR&amp;genome=NC_010079&amp;i=2</a>                               |
| <i>Streptomyces coelicolor</i>     | A3(2) M145      | HrdB  | E-MTAB-6926 | <a href="https://doi.org/10.1093/nar/gky1018">https://doi.org/10.1093/nar/gky1018</a>             | <a href="https://prochipdb.org/tf_dashboard.html?organism=s_coelicolor&amp;tf=HrdB&amp;genome=NC_003888.3&amp;i=0">https://prochipdb.org/tf_dashboard.html?organism=s_coelicolor&amp;tf=HrdB&amp;genome=NC_003888.3&amp;i=0</a>                   |
| <i>Streptomyces coelicolor</i>     | A3(2) M145      | NdgR  | GSE59010    | <a href="https://doi.org/10.1186/s12864-015-1311-0">https://doi.org/10.1186/s12864-015-1311-0</a> | <a href="https://prochipdb.org/tf_dashboard.html?organism=s_coelicolor&amp;tf=NdgR&amp;genome=NC_003888.3&amp;i=1">https://prochipdb.org/tf_dashboard.html?organism=s_coelicolor&amp;tf=NdgR&amp;genome=NC_003888.3&amp;i=1</a>                   |
| <i>Streptomyces coelicolor</i>     | A3(2) M145      | ScbR  | GSE64903    | <a href="https://doi.org/10.1038/srep14831">https://doi.org/10.1038/srep14831</a>                 | <a href="https://prochipdb.org/tf_dashboard.html?organism=s_coelicolor&amp;tf=ScbR&amp;genome=NC_003888.3&amp;i=2">https://prochipdb.org/tf_dashboard.html?organism=s_coelicolor&amp;tf=ScbR&amp;genome=NC_003888.3&amp;i=2</a>                   |
| <i>Streptomyces coelicolor</i>     | A3(2) M145      | ScbR2 | GSE64903    | <a href="https://doi.org/10.1038/srep14831">https://doi.org/10.1038/srep14831</a>                 | <a href="https://prochipdb.org/tf_dashboard.html?organism=s_coelicolor&amp;tf=ScbR2&amp;genome=NC_003888.3&amp;i=3">https://prochipdb.org/tf_dashboard.html?organism=s_coelicolor&amp;tf=ScbR2&amp;genome=NC_003888.3&amp;i=3</a>                 |
| <i>Streptomyces venezuelae</i>     | ATCC 10712      | Lsr2  | GSE115439   | <a href="https://doi.org/10.7554/eLife.47691">https://doi.org/10.7554/eLife.47691</a>             | <a href="https://prochipdb.org/tf_dashboard.html?organism=s_venezuelae&amp;tf=Lsr2&amp;genome=NC_018750.1&amp;i=0">https://prochipdb.org/tf_dashboard.html?organism=s_venezuelae&amp;tf=Lsr2&amp;genome=NC_018750.1&amp;i=0</a>                   |
| <i>Yersinia pseudotuberculosis</i> | IP 32953        | Fur   | GSE181770   |                                                                                                   | <a href="https://prochipdb.org/tf_dashboard.html?organism=y_pseudotuberculosis&amp;tf=Fur&amp;genome=NZ_CP009712.1&amp;i=0">https://prochipdb.org/tf_dashboard.html?organism=y_pseudotuberculosis&amp;tf=Fur&amp;genome=NZ_CP009712.1&amp;i=0</a> |
